# Supplementary material for: Diversification and historical demography of Haloxylon ammodendron in relation to Pleistocene climatic oscillations in northwestern China
Source: PeerJ journal article supplement (doi:10.7717/peerj.14476), 2022-12-13

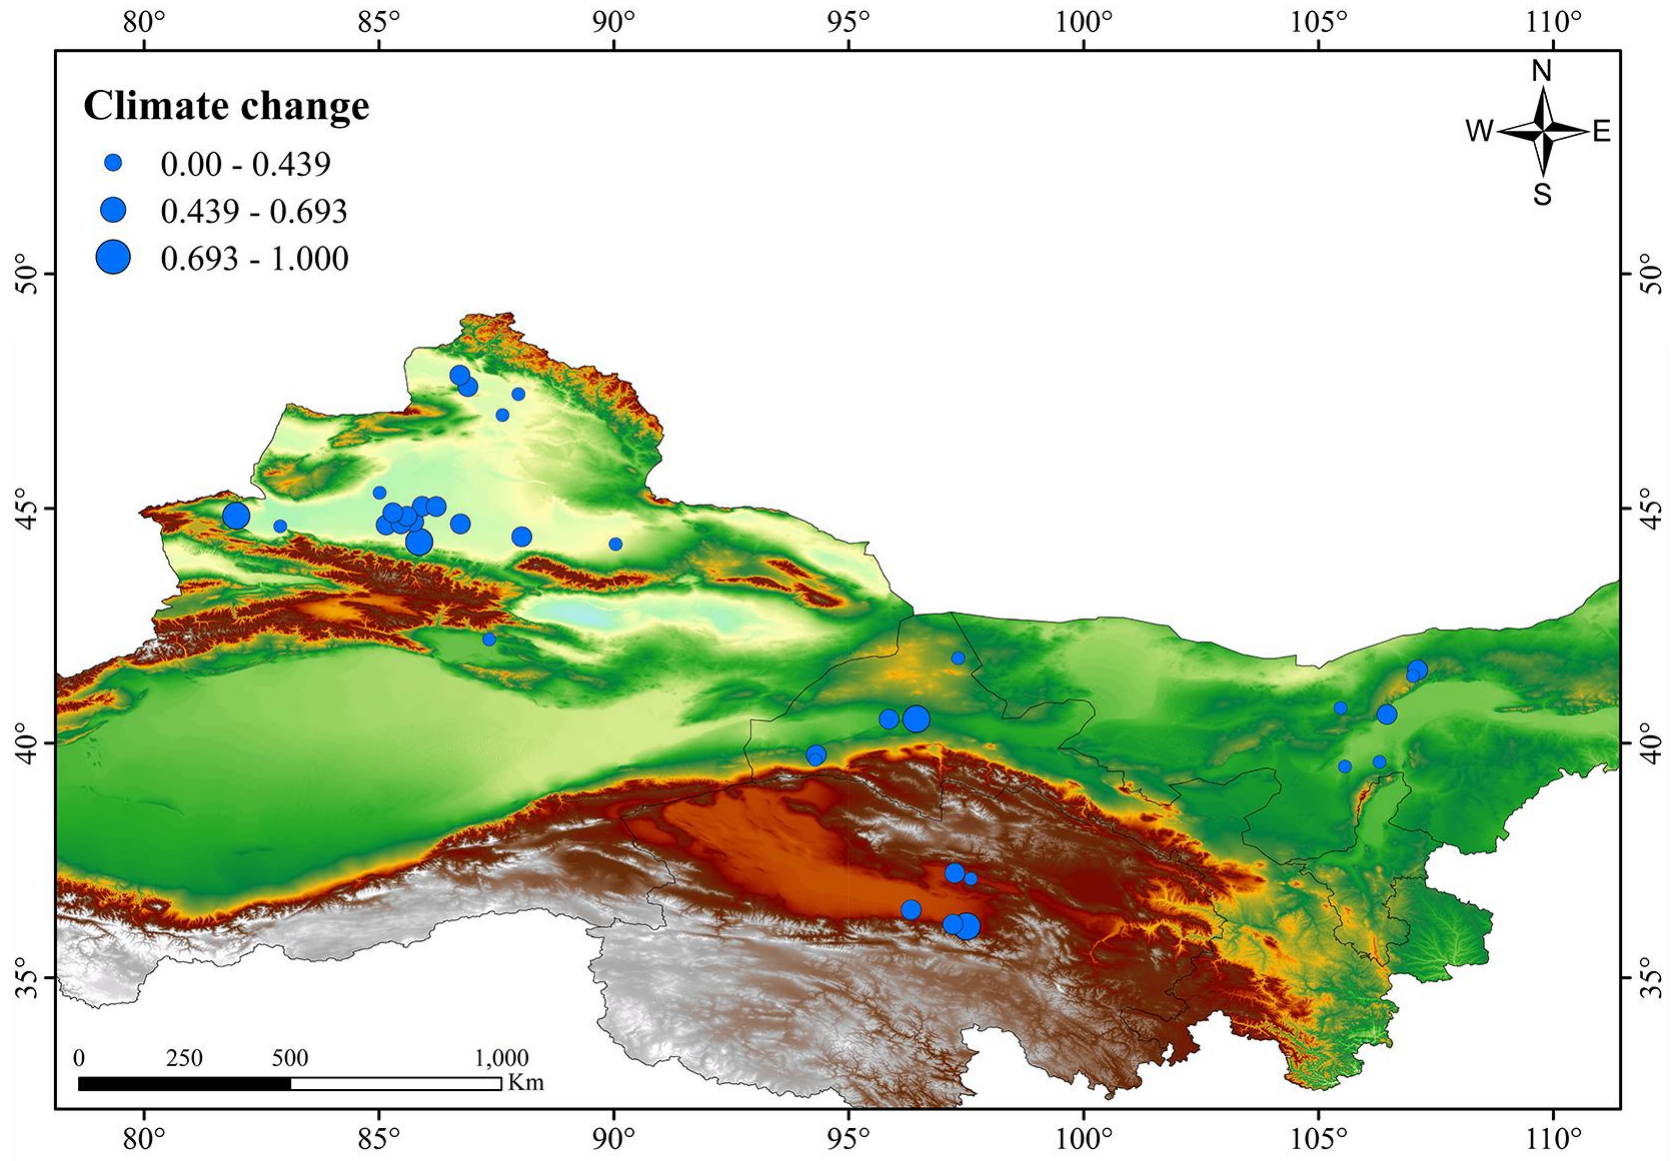

Supplement: Fig_S1.pdf [file Fig_S1.pdf]
